# Supplementary material for: Tryptophan-based styryl homopolymer and polyzwitterions with solvent-induced UCST, ion-induced LCST and pH-induced UCST
Source: Royal Society of Chemistry journal article supplement (doi:10.1039/c8py01512k), 2018-12-10
Supplement: c8py01512k1.pdf [file c8py01512k1.pdf]

## Electronic Supplementary Information

### Tryptophan-Based Styryl Homopolymer and Polyzwitterions with Solvent-Induced UCST, Ion-Induced LCST and pH-Induced UCST

Somdeb Jana<sup>§</sup>, Mahammad Anas<sup>§</sup>, Tanmoy Maji, Sanjib Banerjee<sup>‡</sup> and Tarun K. Mandal\*

*Polymer Science Unit, Indian Association for the Cultivation of Science, Jadavpur, Kolkata*

*700 032, India*

| Contents                                                                                         | Page No. |
|--------------------------------------------------------------------------------------------------|----------|
| Scheme S1. Synthesis of poly(TrpVBz) <sub>50</sub> by deprotected poly(Boc-TrpVBz) <sub>50</sub> | S1       |
| Table S1. Effect of water percentage..... in different mixed solvents.                           | S2       |
| Table S2. Effect of molecular weight.....in different mixed solvents.                            | S3       |
| Figure S1. <sup>1</sup> H-NMR spectrum of Boc-tryptophan                                         | S3       |
| Figure S2. ESI-Mass spectrum of Boc-tryptophan (Boc-Trp)                                         | S4       |
| Figure S3. <sup>1</sup> H-NMR spectrum of..... present in CDCl <sub>3</sub> .                    | S4       |
| Figure S4. <sup>13</sup> C-NMR spectrum of..... (Boc-TrpVBz).                                    | S5       |
| Figure S5. ESI-Mass spectrum of.....(Boc-TrpVBz)                                                 | S5       |
| Figure S6. <sup>1</sup> H-NMR spectrum of poly(Boc-TrpVBz) in DMSO-d <sub>6</sub> .              | S6       |
| Figure S7. FTIR spectrum..... monomer                                                            | S6       |
| Figure S8. MALDI-TOF-MS spectrum.....[poly(Boc-TrpVBz) <sub>8</sub> ].                           | S7       |
| Figure S9 Variation of %T of solutions of..... and (C) DMF-water (31%).                          | S8       |
| Figure S10. Variation of D <sub>h</sub> ..... varying water content.                             | S9       |
| Figure S11. Turbidity curves (at λ = 600 nm) of poly(Boc-TrpVBz).....                            | S9       |
| Figure S12. Turbidity curves (at λ = 600 nm) of poly(Boc-TrpVBz) <sub>50</sub> .....             | S10      |
| Figure S13. Turbidity curves for varying concentration of poly(Boc-TrpVBz) <sub>50</sub> .....   | S11      |
| Figure S14. The plot of % transmittance (at λ = 600 nm)....at different pHs.                     | S11      |
| Figure S15. Variation of hydrodynamic diameter .....of aqueous pH.                               | S12      |
| Figure S16. FESEM, TEM images of.....90 mM Bu <sub>4</sub> NBr at pH 8.5.                        | S12      |

|                                                                                    |     |
|------------------------------------------------------------------------------------|-----|
| Figure S17. % Transmittance versus temperature curves .....of Bu <sub>4</sub> NBr. | S13 |
| Figure S18. % Transmittance vs temperature..... of Bu <sub>4</sub> NBr.            | S13 |
| Figure S19. Turbidity curves (heating/cooling).... at different pHs                | S14 |
| Figure S20. Variation of % transmittance of aqueous solutions of.....              | S14 |
| Figure S21. FESEM image of the aqueous turbid suspension of.....                   | S15 |

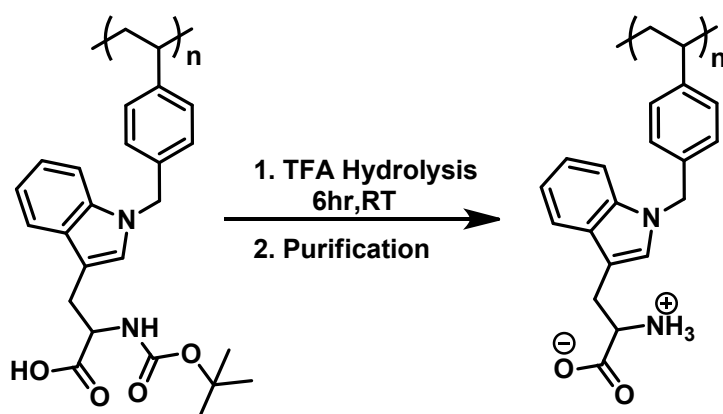

**Scheme S1.** Synthesis of poly(TrpVBz) by the Boc deprotection of poly(Boc-TrpVBz)

**Table S1.** Effect of water percentage on the phase behaviour of poly(Boc-TrpVBz)<sub>50</sub> solution in different mixed solvents.

| Organic solvent | MWP (%) required for turbid suspension as examined via |      | Water percentage (%) | Cloud point ( $T_{cU}$ ) (°C) |
|-----------------|--------------------------------------------------------|------|----------------------|-------------------------------|
|                 | Transmittance                                          | DLS  |                      |                               |
| DMSO            | 21.5                                                   | 21.5 | 21                   | 18.3                          |
|                 |                                                        |      | 23                   | 34.5                          |
|                 |                                                        |      | 25                   | 53.6                          |
|                 |                                                        |      | 27                   | 72.3                          |
| DMF             | 27.5                                                   | 28.0 | 27                   | 19.4                          |
|                 |                                                        |      | 29                   | 29.3                          |
|                 |                                                        |      | 31                   | 40.0                          |
|                 |                                                        |      | 33                   | 51.0                          |
|                 |                                                        |      | 35                   | 31.5                          |
|                 |                                                        |      | 37                   | 69.7                          |
| MeOH            | 11.5                                                   | 11.5 | 10                   | 12.2                          |
|                 |                                                        |      | 12                   | 25.2                          |
|                 |                                                        |      | 14                   | 39.5                          |
|                 |                                                        |      | 16                   | 48.2                          |
|                 |                                                        |      | 18                   | 56.6                          |

**Table S2.** Effect of molecular weight of poly(Boc-TrpVBz) on its UCST-type cloud point ( $T_{cU}$ ) in different mixed solvents.

| Sample name                     | Cloud point ( $T_{cU}$ ) (°C) |                          |                           |
|---------------------------------|-------------------------------|--------------------------|---------------------------|
|                                 | DMSO-Water<br>(23% water)     | DMF-Water<br>(31% water) | MeOH-Water<br>(12% water) |
| Poly(Boc-TrpVBz) <sub>25</sub>  | 11.9                          | -                        | -                         |
| Poly(Boc-TrpVBz) <sub>25</sub>  | 25.8                          | 37.5                     | 21.4                      |
| Poly(Boc-TrpVBz) <sub>50</sub>  | 34.8                          | 40.5                     | 26.9                      |
| Poly(Boc-TrpVBz) <sub>100</sub> | 50.6                          | 45.9                     | 35.4                      |

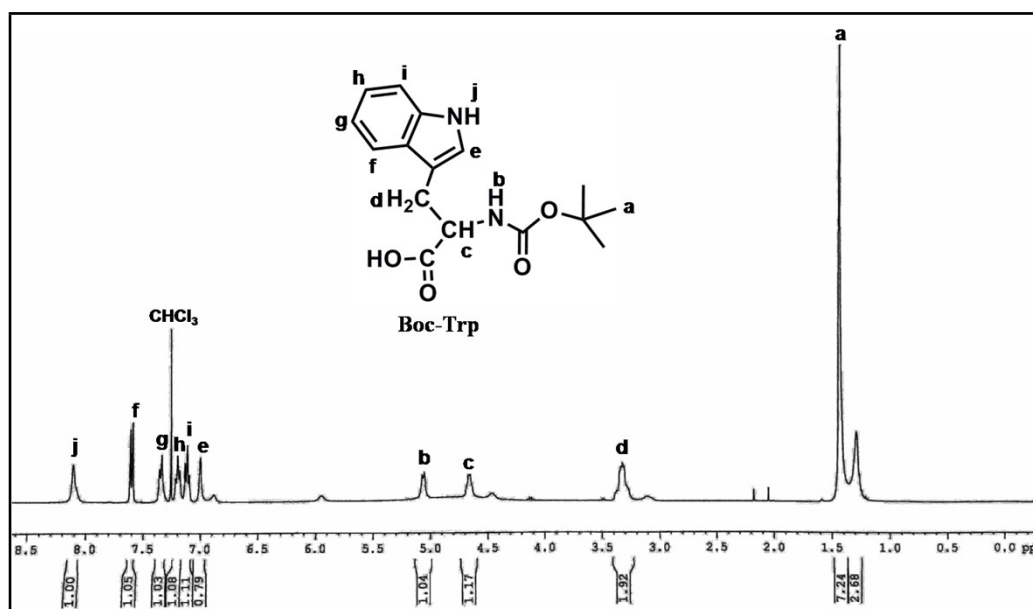

**Figure S1.** <sup>1</sup>H-NMR spectrum of Boc-Trp (The signal at  $\delta$  7.26 ppm corresponds to CHCl<sub>3</sub> present in CDCl<sub>3</sub>).

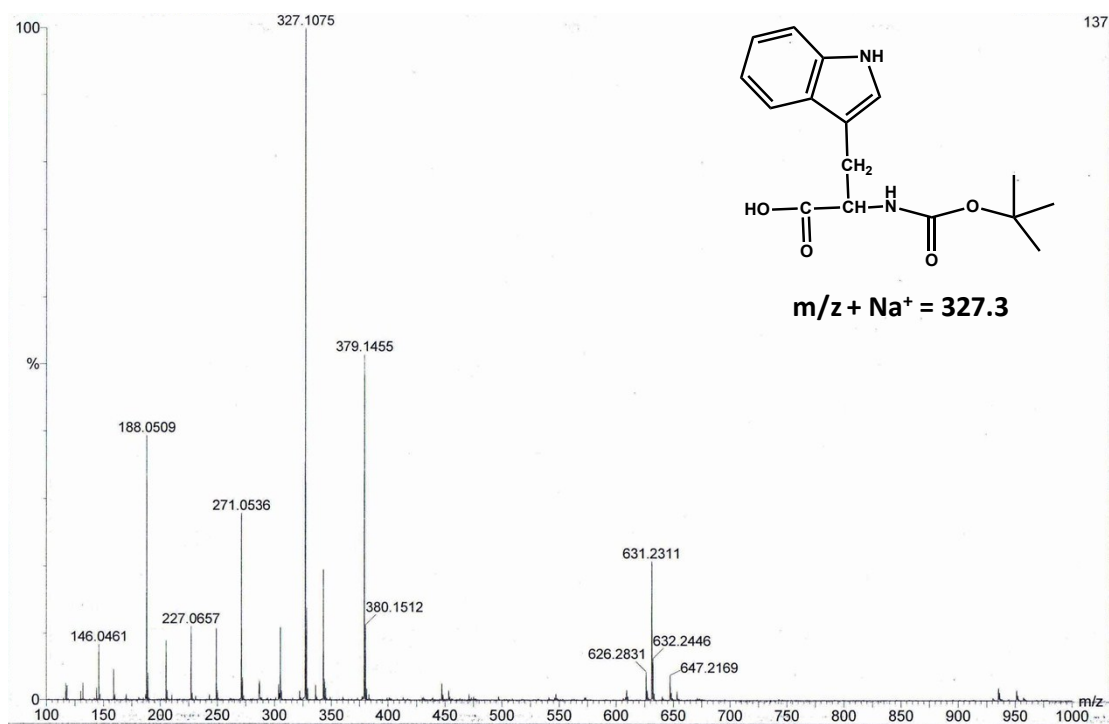

**Figure S2.** ESI-MS spectrum of Boc-Trp (theoretical  $m/z + Na^+ = 327.3$ )

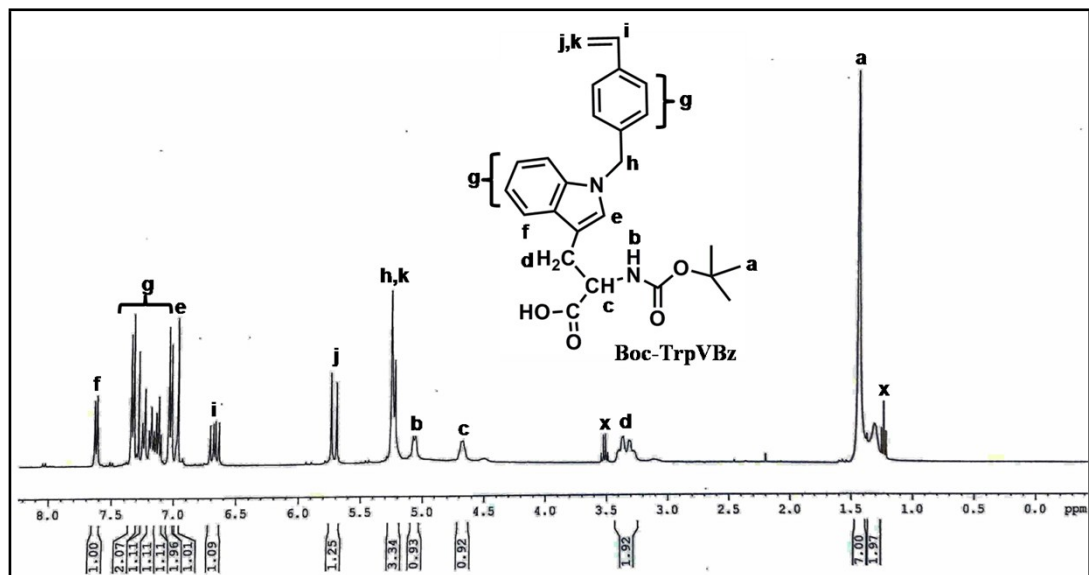

**Figure S3.**  $^1H$ -NMR spectrum of Boc-TrpVBz (The signal at 'x' for diethyl ether).

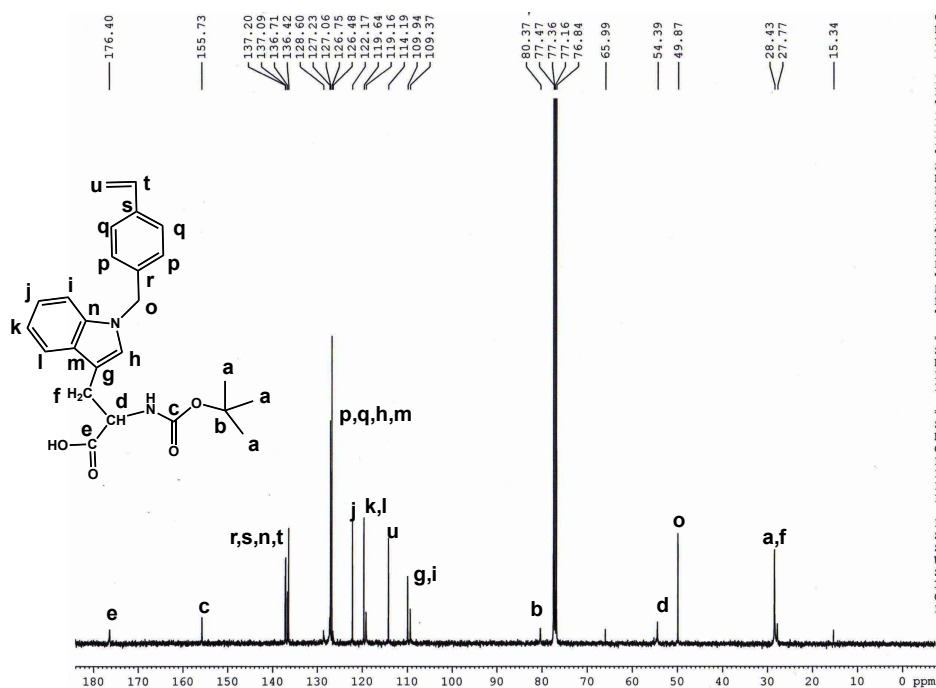

**Figure S4.**  $^{13}\text{C}$ -NMR spectrum of Boc-TrpVBz.

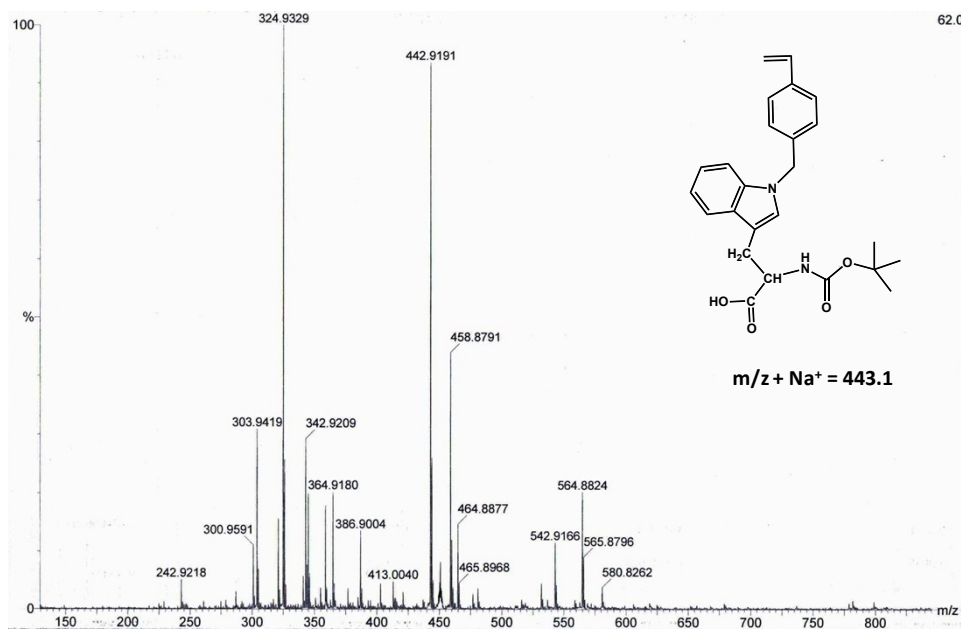

**Figure S5.** ESI-MS spectrum of Boc-TrpVBz (theoretical  $m/z + \text{Na}^+ = 443.1$ ).

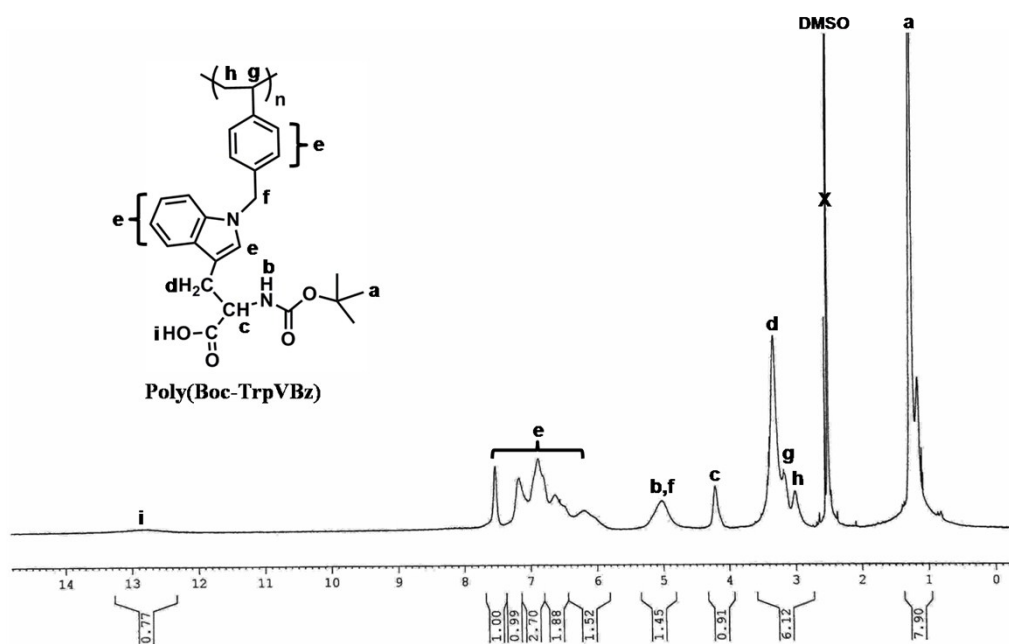

**Figure S6.** <sup>1</sup>H-NMR spectrum of poly(Boc-TrpVBz) in DMSO-d<sub>6</sub>.

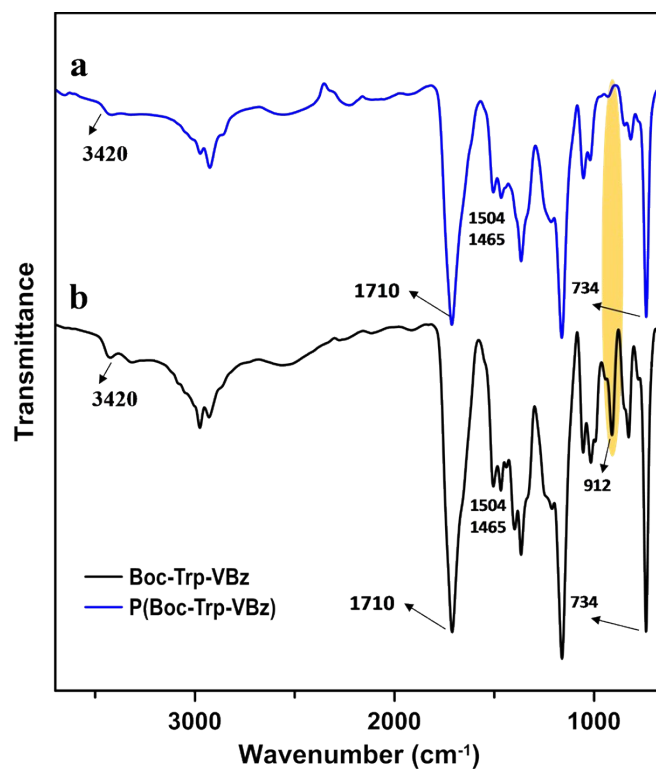

**Figure S7.** FTIR spectra of poly(Boc-TrpVBz) and Boc-TrpVBz monomer





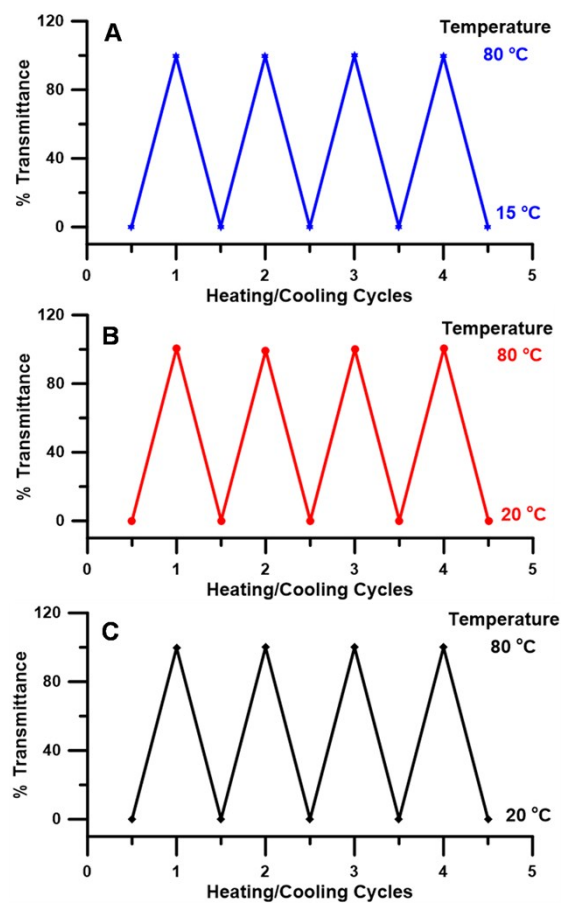

**Figure S9.** Variation of % transmittance of solutions of poly(Boc-TrpVBz)<sub>50</sub> (0.5 wt%) in different mixed solvents under four heating/cooling cycles: (A) MeOH-water (12%); (B) DMSO-water (31%) and (C) DMF-water (31%).

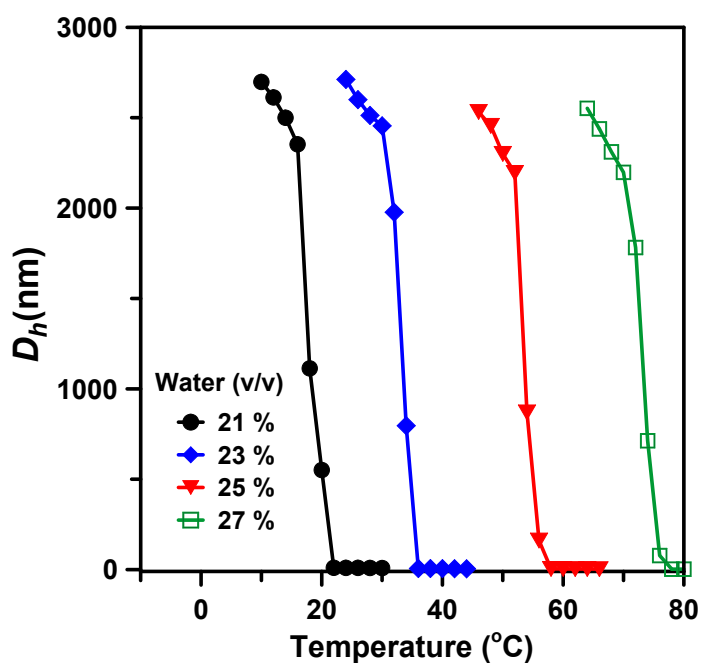

**Figure S10.** Variation of hydrodynamic diameter ( $D_h$ ) with temperature for poly(Boc-TrpVBz)<sub>50</sub> (0.5 wt%) in DMSO-water mixed solvent of varying water content.

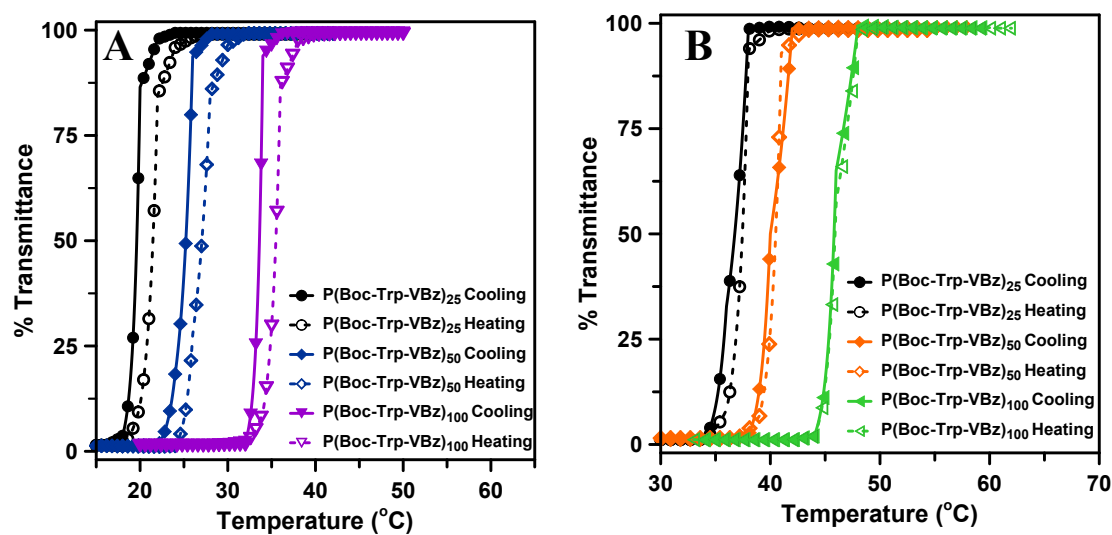

**Figure S11.** Turbidity curves (at  $\lambda = 600$  nm) of poly(Boc-TrpVBz) of different molecular weights in (A) MeOH-Water (12 %) and (B) DMF-water (31 %).

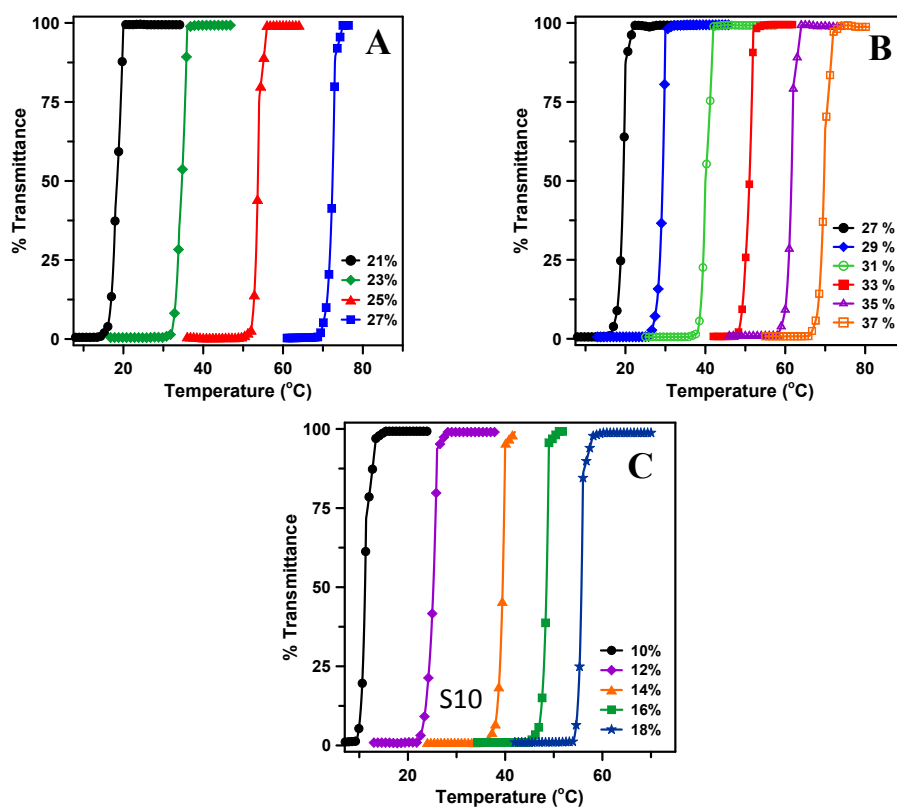

**Figure S12.** Turbidity curves (at  $\lambda = 600$  nm) of poly(Boc-TrpVBz)<sub>50</sub> (0.5 wt%) with the variation of water percentage in mixed solvent containing (A) DMSO, (B) DMF and (C) MeOH.

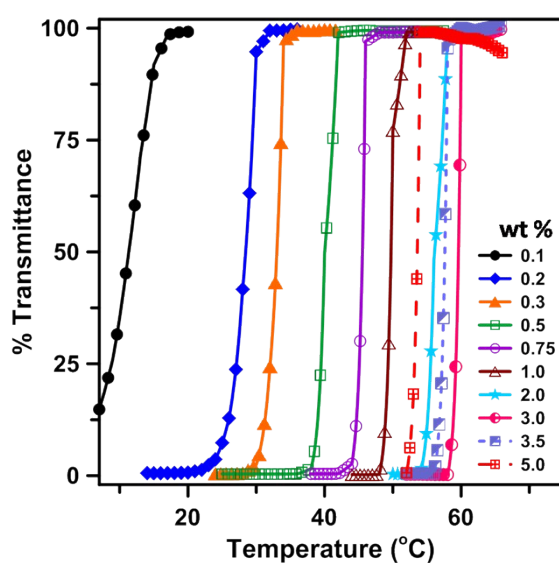

**Figure S13.** Turbidity curves for varying concentration of poly(Boc-TrpVBz)<sub>50</sub> in DMF-water (31 %) mixed solvent.

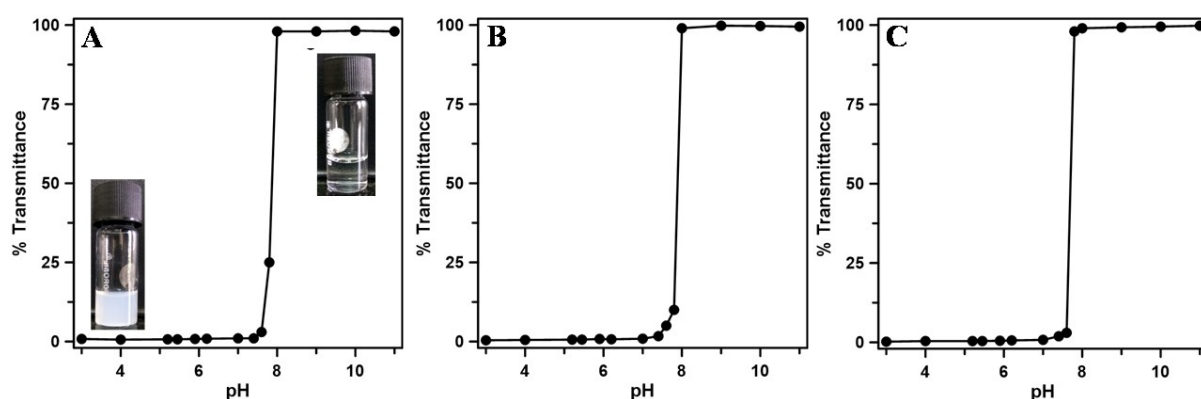

**Figure S14.** The plot of % transmittance (at  $\lambda = 600$  nm) of 0.5 wt % aqueous solutions of poly(Boc-TrpVBz)s of different molecular weights at different pHs: (A) poly(Boc-TrpVBz)<sub>25</sub>; (B) poly(Boc-TrpVBz)<sub>50</sub> and (C) poly(Boc-TrpVBz)<sub>100</sub>. Inset showed the photographs of aqueous poly(Boc-TrpVBz)<sub>25</sub> solution at different pHs.

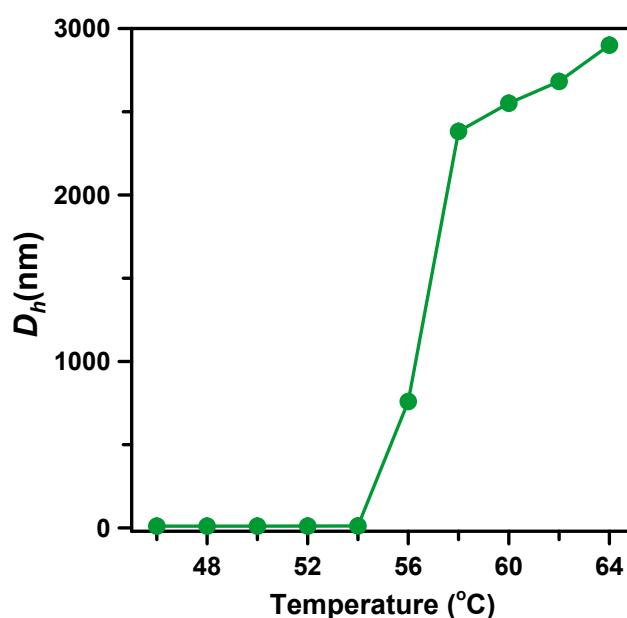

**Figure S15.** Variation of hydrodynamic diameter ( $D_h$ ) with temperature for aqueous poly(Boc-TrpVBz)<sub>100</sub> solution at pH 8.5 in presence of 90 mM of Bu<sub>4</sub>NBr.

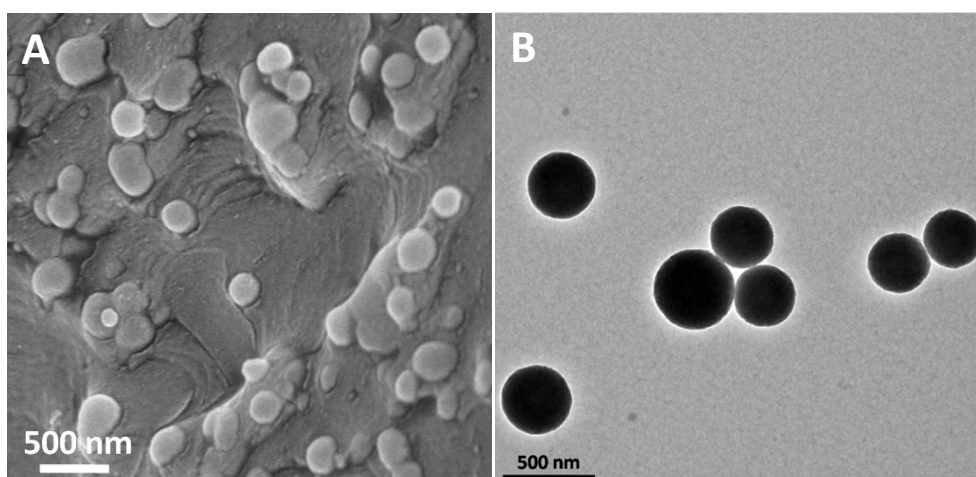

Figure S16. (A) FESEM and (B) TEM images of the aqueous solution of poly(Boc-TrpVBz)<sub>50</sub> (0.5wt%) in the presence of 90 mM Bu<sub>4</sub>NBr at pH 8.5.

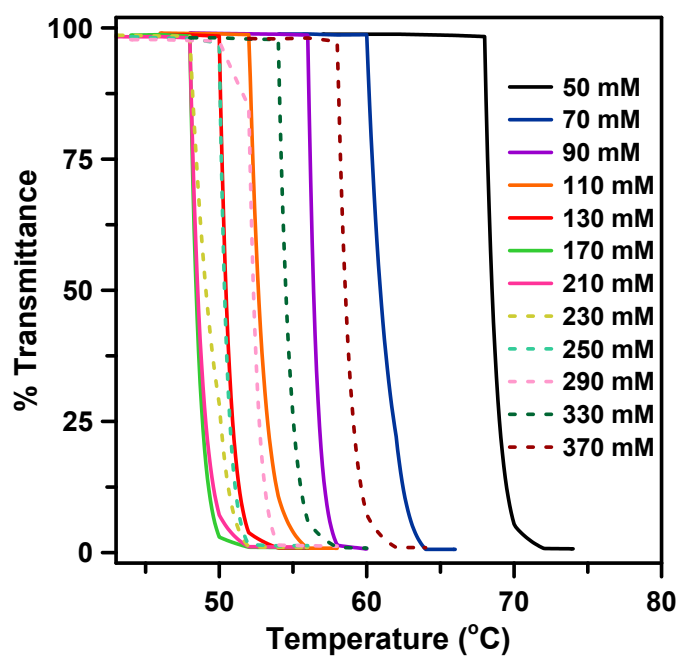

**Figure S17.** % Transmittance versus temperature curves for aqueous poly(Boc-TrpVBz)<sub>100</sub> solution at pH 8.5 in presence of varying concentrations of Bu<sub>4</sub>NBr.

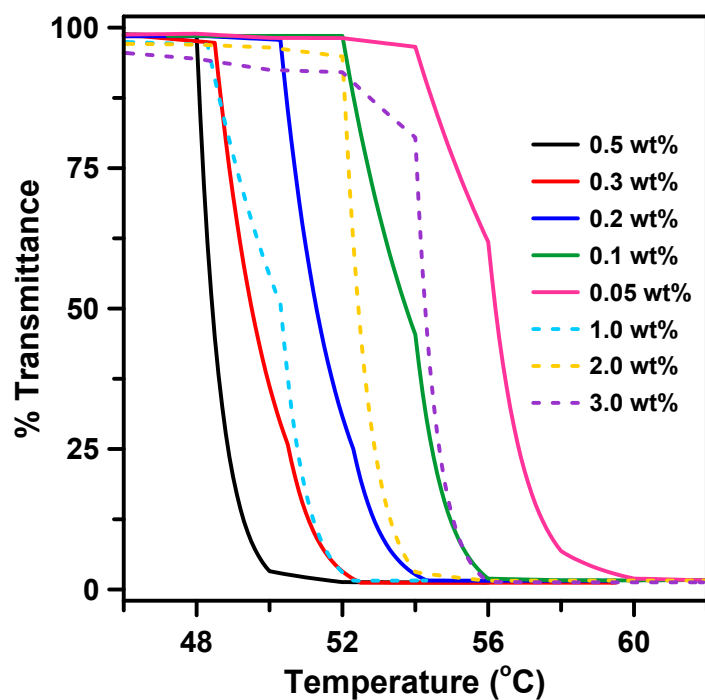

**Figure S18.** % Transmittance versus temperature curves of varying concentrations of aqueous poly(Boc-TrpVBz)<sub>100</sub> solution at pH 8.5 in presence of 170 mM of Bu<sub>4</sub>NBr.

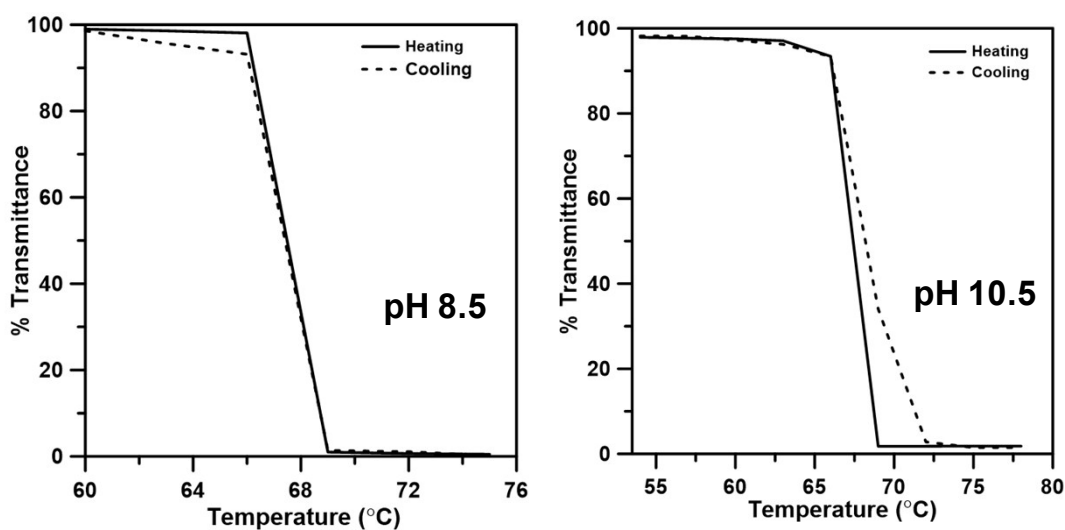

**Figure S19.** Turbidity curves (heating/cooling) of aqueous solutions of poly(Boc-TrpVBz)<sub>50</sub> (0.5 wt%) in the presence of 90 mM Bu<sub>4</sub>NBr at different pHs.

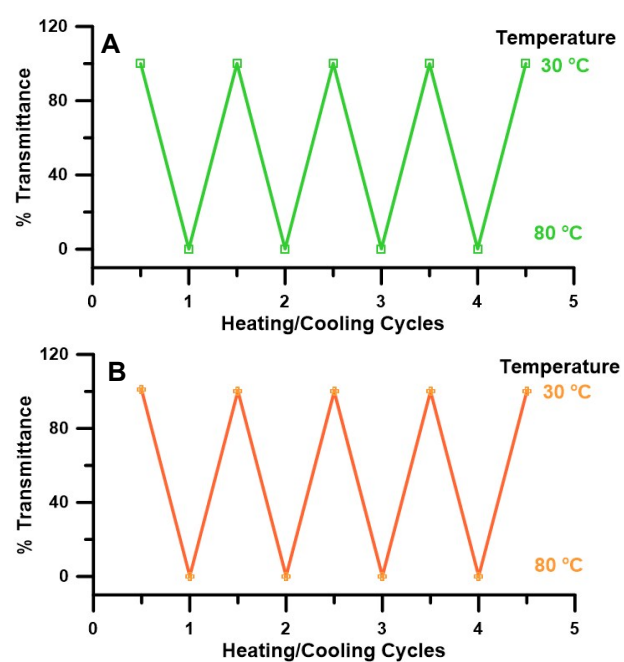

**Figure S20.** Variation of % transmittance of aqueous solutions of poly(Boc-TrpVBz)<sub>50</sub> (0.5 wt%) in the presence of 90 mM Bu<sub>4</sub>NBr under four heating/cooling cycles at different pHs: (A) 8.5 and (B) 10.5.

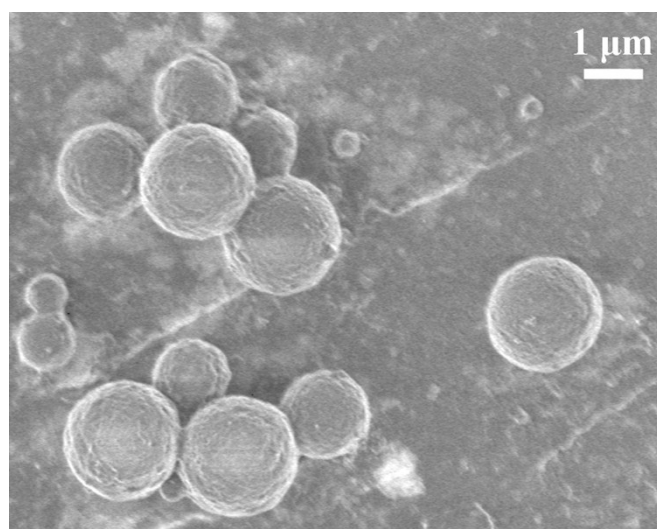



**Figure S21.** FESEM image of the aqueous turbid suspensions of poly(TrpVBz)<sub>50</sub> (0.5 wt%).
